# Supplementary material for: Using Distributed Lag Non-Linear Models to Estimate Exposure Lag-Response Associations between Long-Term Air Pollution Exposure and Incidence of Cardiovascular Disease
Source: MDPI journal article supplement (doi:10.3390/ijerph19052630), 2022-02-24
Supplement: s1 [file s1]

### **Supplementary material**

**Table S1.** Meta-estimates for stroke and IHD using lag 1-5- and 6-10-years moving average PM2.5 total, PM2.5 local and BC total as exposure variables.

|                                                       | IHD                 |                     | Stroke              |                     |
|-------------------------------------------------------|---------------------|---------------------|---------------------|---------------------|
|                                                       | Lag 1-5             | Lag 6-10            | Lag 1-5             | Lag 6-10            |
|                                                       | HR (95% CI)         | HR (95% CI)         | HR (95% CI)         | HR (95% CI)         |
| PM <sub>2.5</sub> total<br>(per 5 µg/m <sup>3</sup> ) | 1.00<br>(0.96-1.04) | 0.99<br>(0.94-1.03) | 1.00<br>(0.95-1.06) | 1.00<br>(0.95-1.06) |
| PM <sub>2.5</sub> local<br>(per 1 µg/m <sup>3</sup> ) | 1.01<br>(0.95-1.07) | 1.00<br>(0.95-1.05) | 0.99<br>(0.93-1.05) | 1.00<br>(0.94-1.06) |
| BC total<br>(per 1 µg/m <sup>3</sup> )                | 0.96<br>(0.84-1.09) | 0.98<br>(0.88-1.10) | 1.02<br>(0.87-1.19) | 1.04<br>(0.91-1.19) |

**Table S2.** Lag (year)-specific meta-estimates for stroke and IHD based on DLNMs in relation to lag 1-10 years annual mean PM<sub>2.5</sub> total, PM<sub>2.5</sub> local and BC total.

| IHD         | PM <sub>2.5</sub> total (per 5 µg/m <sup>3</sup> ) | PM <sub>2.5</sub> local (per 1 µg/m <sup>3</sup> ) | BC total (per 1 µg/m <sup>3</sup> ) |
|-------------|----------------------------------------------------|----------------------------------------------------|-------------------------------------|
| Lag (years) | HR (95% CI)                                        | HR (95% CI)                                        | HR (95% CI)                         |
| 1           | 1.02 (0.86-1.21)                                   | 1.20 (1.02-1.42)                                   | 1.22 (0.80-1.85)                    |
| 2           | 1.00 (0.89-1.14)                                   | 0.99 (0.91-1.08)                                   | 0.92 (0.74-1.14)                    |
| 3           | 0.95 (0.85-1.06)                                   | 0.93 (0.82-1.05)                                   | 0.85 (0.65-1.12)                    |
| 4           | 0.92 (0.81-1.04)                                   | 0.97 (0.90-1.05)                                   | 0.91 (0.77-1.08)                    |
| 5           | 0.94 (0.83-1.07)                                   | 0.99 (0.91-1.08)                                   | 1.00 (0.82-1.23)                    |
| 6           | 0.97 (0.85-1.11)                                   | 1.00 (0.92-1.08)                                   | 1.08 (0.87-1.33)                    |
| 7           | 0.96 (0.84-1.10)                                   | 0.98 (0.90-1.07)                                   | 1.07 (0.92-1.25)                    |
| 8           | 0.90 (0.77-1.04)                                   | 0.99 (0.90-1.09)                                   | 1.02 (0.80-1.29)                    |
| 9           | 0.88 (0.75-1.04)                                   | 1.00 (0.92-1.08)                                   | 0.98 (0.81-1.20)                    |
| 10          | 0.94 (0.80-1.11)                                   | 1.00 (0.88-1.15)                                   | 0.99 (0.70-1.38)                    |
| Stroke      | PM <sub>2.5</sub> total (per 5 µg/m <sup>3</sup> ) | PM <sub>2.5</sub> local (per 1 µg/m <sup>3</sup> ) | BC total (per 1 µg/m <sup>3</sup> ) |
| Lag (years) | HR (95% CI)                                        | HR (95% CI)                                        | HR (95% CI)                         |
| 1           | 0.88 (0.74-1.06)                                   | 0.86 (0.70-1.06)                                   | 0.65 (0.39-1.15)                    |
| 2           | 1.14 (0.82-1.58)                                   | 1.07 (0.93-1.24)                                   | 1.25 (0.88-1.78)                    |
| 3           | 1.21 (0.77-1.90)                                   | 1.08 (0.95-1.23)                                   | 1.36 (0.86-2.13)                    |
| 4           | 1.08 (0.70-1.68)                                   | 0.97 (0.89-1.07)                                   | 1.02 (0.82-1.27)                    |
| 5           | 0.96 (0.80-1.15)                                   | 0.94 (0.83-1.07)                                   | 0.87 (0.69-1.11)                    |
| 6           | 1.00 (0.86-1.17)                                   | 0.99 (0.89-1.09)                                   | 0.90 (0.70-1.16)                    |
| 7           | 1.06 (0.77-1.45)                                   | 1.06 (0.97-1.14)                                   | 1.07 (0.87-1.31)                    |
| 8           | 1.04 (0.81-1.33)                                   | 1.08 (0.97-1.21)                                   | 1.25 (0.94-1.66)                    |
| 9           | 0.97 (0.81-1.16)                                   | 1.04 (0.94-1.14)                                   | 1.15 (0.90-1.46)                    |
| 10          | 0.97 (0.69-1.37)                                   | 0.91 (0.77-1.07)                                   | 0.77 (0.51-1.16)                    |

**Table S3.** Lag (year)-specific meta-estimates for stroke and IHD in relation to annual mean PM<sub>2.5</sub> total, PM<sub>2.5</sub> local and BC total using separate Cox regression models for each year of lag.

| IHD         | PM <sub>2.5</sub> total (per 5 µg/m <sup>3</sup> ) | PM <sub>2.5</sub> local (per 1 µg/m <sup>3</sup> ) | BC total (per 1 µg/m <sup>3</sup> ) |
|-------------|----------------------------------------------------|----------------------------------------------------|-------------------------------------|
| Lag (years) | HR (95% CI)                                        | HR (95% CI)                                        | HR (95% CI)                         |
| 1           | 0.97 (0.81-1.16)                                   | 1.04 (0.90-1.21)                                   | 0.96 (0.86-1.07)                    |
| 2           | 1.07 (0.96-1.20)                                   | 1.04 (0.92-1.16)                                   | 0.99 (0.88-1.10)                    |
| 3           | 0.97 (0.87-1.09)                                   | 1.04 (0.90-1.20)                                   | 0.97 (0.87-1.09)                    |
| 4           | 1.00 (0.89-1.13)                                   | 1.02 (0.89-1.16)                                   | 0.95 (0.85-1.07)                    |
| 5           | 0.98 (0.86-1.12)                                   | 1.00 (0.92-1.09)                                   | 0.97 (0.87-1.09)                    |
| 6           | 0.99 (0.86-1.13)                                   | 1.01(0.90-1.14)                                    | 0.99 (0.88-1.11)                    |
| 7           | 1.04 (0.91-1.19)                                   | 1.00 (0.94-1.07)                                   | 0.99 (0.86-1.11)                    |
| 8           | 1.01 (0.88-1.15)                                   | 1.00 (0.88-1.13)                                   | 0.97 (0.86-1.08)                    |
| 9           | 0.86 (0.75-0.99)                                   | 1.00(0.94-1.06)                                    | 1.00 (0.89-1.12)                    |
| 10          | 1.03 (0.90-1.17)                                   | 1.00 (0.93-1.07)                                   | 0.99 (0.89-1.11)                    |
| Stroke      | PM <sub>2.5</sub> total (per 5 µg/m <sup>3</sup> ) | PM <sub>2.5</sub> local (per 1 µg/m <sup>3</sup> ) | BC total (per 1 µg/m <sup>3</sup> ) |
| Lag (years) | HR (95% CI)                                        | HR (95% CI)                                        | HR (95% CI)                         |
| 1           | 0.90 (0.78-1.04)                                   | 0.96 (0.89-1.04)                                   | 0.94 (0.77-1.15)                    |
| 2           | 1.05 (0.85-1.30)                                   | 0.98 (0.91-1.06)                                   | 1.00 (0.83-1.21)                    |
| 3           | 1.05 (0.93-1.20)                                   | 0.98 (0.91-1.05)                                   | 1.00 (0.84-1.20)                    |
| 4           | 0.94 (0.82-1.08)                                   | 0.97 (0.90-1.04)                                   | 1.01 (0.85-1.20)                    |
| 5           | 1.02 (0.81-1.08)                                   | 0.98 (0.91-1.05)                                   | 1.03 (0.87-1.21)                    |
| 6           | 1.07 (0.81-1.27)                                   | 0.98 (0.92-1.06)                                   | 1.00 (0.85-1.19)                    |
| 7           | 0.89 (0.61-1.30)                                   | 0.99 (0.92-1.07)                                   | 1.03 (0.88-1.21)                    |
| 8           | 1.11 (0.91-1.37)                                   | 0.99 (0.90-1.08)                                   | 1.06 (0.91-1.24)                    |
| 9           | 0.97 (0.83-1.13)                                   | 1.00 (0.94-1.08)                                   | 1.06 (0.91-1.24)                    |
| 10          | 1.09 (0.94-1.27)                                   | 1.00 (0.94-1.07)                                   | 1.05 (0.90-1.22)                    |
